# Supplementary material for: Vaccine Uptake to Prevent Meningitis and Encephalitis in Shanghai, China
Source: MDPI journal article supplement (doi:10.3390/vaccines10122054), 2022-11-30
Supplement: s1 [file s1]

## **Supplementary Text**

### *Validity and Reliability Measurement of Health Belief Model (HBM)*

For the HBM, KMO value was estimated to be 0.884, and the HBM constructs were significantly correlated by Bartlett's test of sphericity ( $p < 0.0001$ ). All the Cronbach's  $\alpha$  in the reliability of HBM constructs was almost and above 0.6, which was acceptable (Supplementary Material, Table S2). AVE in three HBM constructs was above 0.5 (Supplementary Material, Table S1), and most external factor loadings were above 0.7 (Supplementary Material, Table S3), suggesting good convergent validity. To further evaluate the discriminant validity, we compared the cross loadings within and between the HBM constructs and subscale ratings, which verified the consistency of different items loaded on their specific structures (Supplementary Material, Table S3). Additionally, multicollinearity was excluded as all VIFs of the HBM constructs were less than 5.

**Table S1.** Six vaccines that may prevent meningitis/encephalitis in children and their manufacturers.

| Vaccines                                                                                                | Types                                     | Manufacturers                                      |
|---------------------------------------------------------------------------------------------------------|-------------------------------------------|----------------------------------------------------|
| Meningococcal polysaccharide vaccine (MPSV) / meningococcal polysaccharide conjugate vaccine (MPCV)     | MPSV-A (EPI)                              | Wuhan Institute of Biological Products Co., Ltd.   |
|                                                                                                         | MPSV-AC (EPI)                             | Lanzhou Institute of Biological Products Co., Ltd. |
|                                                                                                         | MPSV-AC (EPI)                             | Walvax Biotechnology Co.,Ltd.                      |
|                                                                                                         | MPCV-AC                                   | Royal (Wuxi) Bio-Pharmaceutical Co.,Ltd.           |
|                                                                                                         | MPCV-AC                                   | Chongqing Zhifei Biological Products Co.,Ltd.      |
|                                                                                                         | MPCV-AC                                   | Walvax Biotechnology Co., Ltd.                     |
|                                                                                                         | MPCV-AC/Hib                               | Chongqing Zhifei Biological Products Co.,Ltd.      |
|                                                                                                         | MPSV-ACY135                               | Chongqing Zhifei Biological Products Co.,Ltd.      |
|                                                                                                         | MPSV-ACY135                               | Chengdu Kanghua Biological Products Co., Ltd.      |
|                                                                                                         | MPSV-ACY135                               | Walvax Biotechnology Co., Ltd.                     |
| Japanese encephalitis vaccine (JEV)                                                                     | MPCV-ACYW135                              | Cansino Biologics Inc.                             |
|                                                                                                         | Live attenuated JEV (EPI)                 | Wuhan Institute of Biological Products Co., Ltd.   |
|                                                                                                         | Live attenuated JEV (EPI)                 | Chengdu Institute of Biological Products Co., Ltd  |
|                                                                                                         | Inactivated JEV (Vero cell), freeze-dried | Liaoning Chengda Biotechnology Co., Ltd.           |
| 13-valent pneumococcal conjugate vaccine (PCV13)/23-valent pneumococcal polysaccharide vaccine (PPSV23) | PCV13                                     | Pfizer Inc.                                        |
|                                                                                                         | PCV13                                     | Walvax Biotechnology Co., Ltd.                     |
|                                                                                                         | PPSV23                                    | Sinovac Biotech Co., LTD.                          |
|                                                                                                         | PPSV23                                    | Chengdu Institute of Biological Products Co., Ltd  |
|                                                                                                         | PPSV23                                    | Merck & Co., Inc.                                  |
|                                                                                                         | PPSV23                                    | Walvax Biotechnology Co.,Ltd.                      |
|                                                                                                         | PPSV23                                    | Beijing Minhai Biotechnology Co., Ltd              |
| <i>Haemophilus influenzae</i> type b (Hib)-containing vaccines                                          | Hib conjugate vaccine                     | Lanzhou Institute of Biological Products Co., Ltd. |
|                                                                                                         | Hib conjugate vaccine                     | SANOFI PASTEUR S.A.                                |
|                                                                                                         | DTP-IPV-Hib vaccine                       | SANOFI PASTEUR S.A.                                |
|                                                                                                         | Hib conjugate vaccine                     | Walvax Biotechnology Co.,Ltd.                      |
|                                                                                                         | Hib conjugate vaccine, freeze-dried       | Beijing Minhai Biotechnology Co., Ltd              |
|                                                                                                         | DTP-Hib vaccine                           | Beijing Minhai Biotechnology Co., Ltd              |

| Vaccines                                   | Types                              | Manufacturers                                                     |
|--------------------------------------------|------------------------------------|-------------------------------------------------------------------|
| Oral live attenuated rotavirus vaccine     | Hib conjugate vaccine              | Beijing Zhifei lvzhu Biopharmaceutical Co.,Ltd.                   |
|                                            | MPCV-AC/Hib                        | Beijing Zhifei lvzhu Biopharmaceutical Co.,Ltd.                   |
|                                            | Hib conjugate vaccine              | Chengdu Olymvax Biopharmaceuticals Inc.                           |
|                                            | Chinese lamb rotavirus vaccine     | Lanzhou Institute of Biological Products Co., Ltd.                |
|                                            | Pentavalent rotavirus vaccine      | Merck & Co., Inc.                                                 |
| Inactivated enterovirus 71 (EV-71) vaccine | EV-71 vaccine (Vero cell)          | Sinovac Biotech Co., LTD.                                         |
|                                            | EV-71 vaccine (Vero cell)          | Wuhan Institute of Biological Products Co., Ltd.                  |
|                                            | EV-71 vaccine (Human Diploid cell) | Institute of Medical Biology, Chinese Academy of Medical Sciences |

EPI, expanded program of immunization; DTP, diphtheria-tetanus-pertussis vaccine; IPV, inactivated polio vaccine.

Meningococcal vaccines and Japanese encephalitis vaccines that are included in EPI were labeled with (EPI), and the rest of these two vaccines are non-EPI surrogate vaccines. The other four vaccines are all non-EPI non-surrogate vaccines.

**Table S2.** Reliability of health belief model (HBM) constructs.

| HBM Constructs           | Subscale Ratings | Loadings | Cronbach's $\alpha$ | Composite Reliability | Average Variance Extracted (AVE) |
|--------------------------|------------------|----------|---------------------|-----------------------|----------------------------------|
| Perceived susceptibility | 1                | 0.600    | 0.583               | 0.47                  | 0.31                             |
|                          | 2                | 0.506    |                     |                       |                                  |
| Perceived severity       | 3                | 0.843    | 0.899               | 0.84                  | 0.72                             |
|                          | 4                | 0.855    |                     |                       |                                  |
| Perceived benefits       | 5                | 0.510    | 0.777               | 0.28                  | 0.45                             |
|                          | 6                | 0.562    |                     |                       |                                  |
| Self-efficacy            | 7                | 0.570    | 0.837               | 0.70                  | 0.45                             |
|                          | 8                | 0.751    |                     |                       |                                  |
|                          | 9                | 0.670    |                     |                       |                                  |
| Perceived barriers       | 10               | 0.582    | 0.791               | 0.77                  | 0.54                             |
|                          | 11               | 0.891    |                     |                       |                                  |
|                          | 12               | 0.700    |                     |                       |                                  |
| Cues to action           | 13               | 0.812    | 0.866               | 0.79                  | 0.65                             |
|                          | 14               | 0.805    |                     |                       |                                  |
|                          | 15               | 0.701    |                     |                       |                                  |
|                          | 16               | 0.738    |                     |                       |                                  |

**Table S3.** External factor loadings of health belief model (HBM) constructs.

| <b>Subscale Ratings</b> | <b>Perceived Susceptibility</b> | <b>Perceived Severity</b> | <b>Perceived Benefits</b> | <b>Self-Efficacy</b> | <b>Perceived Barriers</b> | <b>Cues to Action 1 *</b> | <b>Cues to Action 2 *</b> | <b>Vaccine Uptake</b> |
|-------------------------|---------------------------------|---------------------------|---------------------------|----------------------|---------------------------|---------------------------|---------------------------|-----------------------|
| <b>1</b>                | 0.506                           | 0.319                     | 0.078                     | 0.303                | -0.089                    | 0.218                     | -0.099                    | 0.191                 |
| <b>2</b>                | 0.600                           | 0.024                     | 0.071                     | 0.197                | -0.296                    | 0.056                     | -0.153                    | -0.058                |
| <b>3</b>                | 0.090                           | 0.843                     | 0.076                     | 0.169                | -0.033                    | 0.210                     | -0.089                    | 0.036                 |
| <b>4</b>                | 0.055                           | 0.855                     | 0.049                     | 0.209                | -0.017                    | 0.209                     | -0.088                    | -0.057                |
| <b>5</b>                | 0.110                           | 0.562                     | 0.435                     | 0.290                | -0.025                    | 0.333                     | -0.109                    | 0.207                 |
| <b>6</b>                | 0.190                           | 0.365                     | 0.510                     | 0.310                | -0.093                    | 0.347                     | -0.088                    | -0.060                |
| <b>7</b>                | 0.124                           | 0.405                     | 0.152                     | 0.570                | -0.066                    | 0.395                     | -0.049                    | 0.040                 |
| <b>8</b>                | 0.139                           | 0.161                     | 0.133                     | 0.751                | -0.207                    | 0.209                     | -0.078                    | -0.001                |
| <b>9</b>                | 0.101                           | 0.246                     | 0.061                     | 0.670                | -0.157                    | 0.229                     | -0.089                    | 0.156                 |
| <b>10</b>               | 0.012                           | -0.161                    | 0.004                     | -0.186               | 0.582                     | -0.142                    | 0.209                     | -0.130                |
| <b>11</b>               | -0.135                          | -0.004                    | -0.075                    | -0.016               | 0.891                     | -0.021                    | 0.169                     | -0.054                |
| <b>12</b>               | -0.135                          | 0.052                     | 0.005                     | -0.025               | 0.700                     | -0.018                    | 0.218                     | 0.120                 |
| <b>13</b>               | -0.100                          | -0.111                    | -0.048                    | -0.061               | 0.255                     | -0.117                    | 0.812                     | 0.027                 |
| <b>14</b>               | -0.079                          | -0.087                    | -0.025                    | -0.027               | 0.322                     | -0.080                    | 0.805                     | -0.051                |
| <b>15</b>               | 0.118                           | 0.328                     | 0.093                     | 0.307                | -0.124                    | 0.738                     | -0.141                    | -0.021                |
| <b>16</b>               | 0.098                           | 0.374                     | 0.137                     | 0.325                | -0.056                    | 0.701                     | -0.138                    | 0.046                 |
| <b>Vaccine uptake</b>   | 0.160                           | 0.047                     | 0.001                     | 0.253                | 0.086                     | 0.038                     | 0.034                     | 1.000                 |

\* In the HBM, grouping of C13 and C14 (cues to action 1), and C15 and C16 (cues to action 2) led to a better discriminant validity.

## Survey Questionnaire

A0. Do you have any children aged 1-6 years?

1. No (survey is over, thank you for your time)
2. Yes (please continue)

### A. Demographics

A1. Your relationship with your child?

1. Father 2. Mother 3. Grandfather 4. Grandmother

A2. What is your birth year? \_\_\_\_\_

A3. Where is your registered residence?

\_\_\_\_\_ province \_\_\_\_\_ city/prefecture/region

A4. What is your ethnic group?

A5. What is your highest educational level?

1. Primary school 2. Middle school 3. High school/technical secondary school/technical school/secondary vocational technical school 4. College 5. University (bachelor' degree) 6. Master's degree or above

A6. What is your household (family) monthly income (CNY)?

1. <5000 2. 5000-9999 3. 10000-14999 4. 15000-19999 5. 20000-29999 6. 30000-39999 7. 40000-49999 8. >50000 9. No disclosure

A7. How many children do you have? (If you are a grandparent, how many grandchildren do you have living or caring for together?)

1. One (What is your child's birth year \_\_\_\_\_)
2. Two (What is your first child's birth year \_\_\_\_\_  
What is your second child's birth year \_\_\_\_\_)
3. Three (What is your first child's birth year \_\_\_\_\_  
What is your second child's birth year \_\_\_\_\_  
What is your third child's birth year \_\_\_\_\_)

### B. Diseases and vaccines

B1. Has your child ever suffered from the following diseases?

- |                                  |                              |
|----------------------------------|------------------------------|
| B11. Meningitis or encephalitis  | 1. Yes 2. No 3. I don't know |
| B12. Pneumonia                   | 1. Yes 2. No 3. I don't know |
| B13. Diarrhea                    | 1. Yes 2. No 3. I don't know |
| B14. Hand-foot-and-mouth disease | 1. Yes 2. No 3. I don't know |

B2. What are the common manifestations of meningitis/encephalitis in children? (There may be more than one correct answers)

1. Headache, dizziness, fever, nausea, vomiting
2. Mental symptoms, personality change, memory impairment, abnormal physical activity, irritability, convulsions, respiratory disorders, incontinence
3. There may be no obvious symptom
4. I don't know

B3. Which of the following pathogens may cause meningitis/encephalitis in children? (There may be more than one correct answers)

1. Meningococcus
2. Japanese encephalitis virus
3. Streptococcus pneumonia
4. *Haemophilus influenzae* type b
5. Rotavirus
6. Enterovirus-71
7. Herpes simplex virus
8. Varicella zoster virus
9. Measles virus
10. Mumps virus

B4. What is the possible transmission route of the following pathogens? (There may be more than one correct answers)

|                                      | Airborne | Food-borne | Close contact | Mosquito-borne | Blood-borne |
|--------------------------------------|----------|------------|---------------|----------------|-------------|
| Meningococcus                        |          |            |               |                |             |
| Japanese encephalitis virus          |          |            |               |                |             |
| Streptococcus pneumonia              |          |            |               |                |             |
| <i>Haemophilus influenzae</i> type b |          |            |               |                |             |
| Rotavirus                            |          |            |               |                |             |
| Enterovirus-71                       |          |            |               |                |             |
| Herpes simplex virus                 |          |            |               |                |             |
| Varicella zoster virus               |          |            |               |                |             |
| Measles virus                        |          |            |               |                |             |
| Mumps virus                          |          |            |               |                |             |

B5. What diseases could be prevented by the following vaccines? (There may be more than one correct answers)

|                                                                         | Meningitis/Encephalitis | Pneumonia | Diarrhea | Hand-foot-and-mouth disease |
|-------------------------------------------------------------------------|-------------------------|-----------|----------|-----------------------------|
| Meningococcal vaccine (Epidemic M/E vaccine in Chinese)                 |                         |           |          |                             |
| Japanese encephalitis vaccine (Category II M/E vaccine in Chinese)      |                         |           |          |                             |
| Pneumococcal vaccine (13-valent/23-valent)                              |                         |           |          |                             |
| Hib-containing vaccine (Hib vaccine, quadruple vaccine or pentavaccine) |                         |           |          |                             |
| Rotavirus vaccine                                                       |                         |           |          |                             |
| EV-71 vaccine                                                           |                         |           |          |                             |

### C. Health beliefs

Vaccines that may prevent M/E (M/E vaccines) include meningococcal vaccine (epidemic M/E vaccine in Chinese), Japanese encephalitis vaccine (category II M/E vaccine in Chinese), pneumococcal vaccine (13-valent/23-valent), Hib-containing vaccine (Hib vaccine, quadruple vaccine or pentavaccine), rotavirus vaccine, and EV-71 vaccine.

|     |                                                                                           | Strongly agree | agree | neutral | disagree | Strongly disagree |
|-----|-------------------------------------------------------------------------------------------|----------------|-------|---------|----------|-------------------|
| C1  | Risk of getting M/E is very high for children.                                            |                |       |         |          |                   |
| C2  | My child is very susceptible to getting M/E.                                              |                |       |         |          |                   |
| C3  | M/E has a very serious impact on children's health.                                       |                |       |         |          |                   |
| C4  | Children feel very sick when they get M/E.                                                |                |       |         |          |                   |
| C5  | M/E vaccines effectively protect children from infection.                                 |                |       |         |          |                   |
| C6  | M/E vaccines are beneficial for children's life and study.                                |                |       |         |          |                   |
| C7  | My child can receive M/E vaccines.                                                        |                |       |         |          |                   |
| C8  | Chance of adverse reactions to M/E vaccines is low.                                       |                |       |         |          |                   |
| C9  | Physicians may properly handle potential adverse reactions to M/E vaccines.               |                |       |         |          |                   |
| C10 | M/E vaccination is expensive.                                                             |                |       |         |          |                   |
| C11 | M/E vaccination service is inconvenient.                                                  |                |       |         |          |                   |
| C12 | M/E vaccines may have long-term adverse effects in children.                              |                |       |         |          |                   |
| C13 | I have no idea of pathogens that may cause M/E in children.                               |                |       |         |          |                   |
| C14 | I have no idea of vaccines that may prevent M/E in children.                              |                |       |         |          |                   |
| C15 | I am likely to vaccinate my child when more information is available on M/E and vaccines. |                |       |         |          |                   |
| C16 | I am likely to vaccinate my child when M/E vaccines are more widely accepted.             |                |       |         |          |                   |



#### **D. Vaccine uptake**

Has your child received any of the following vaccines?

D11. Meningococcal vaccine

1. Yes 2. No (if your answer is “yes”, please response to D21)

D21. Which type of meningococcal vaccine has your child received?

1. Free vaccine
2. Self-paid vaccine
3. I don't know

D12. Japanese encephalitis vaccine

1. Yes 2. No (if your answer is “yes”, please response to D22)

D22. Which type of Japanese encephalitis vaccine has your child received?

1. Free vaccine
2. Self-paid vaccine
3. I don't know

D13. Pneumococcal vaccine (13-valent/23-valent)

1. Yes 2. No (if your answer is “yes”, please response to D23)

D23. Which type of Pneumococcal vaccine has your child received?

1. 13-valent
2. 23-valent
3. I don't know

D14. Hib-containing vaccine (Hib vaccine, Quadruple vaccine or Pentavaccine)

1. Yes 2. No (if your answer is “yes”, please response to D24)

D24. Which type of Hib containing vaccine has your child received?

1. Hib vaccine
2. Quadruple
3. Pentavaccine
4. I don't know

D15. Rotavirus vaccine

1. Yes 2. No (if your answer is “yes”, please response D25)

D25. Which type of Hib containing vaccine has your child received?

1. Domestic vaccine
2. Imported vaccine
3. I don't know

D16. EV-71 vaccine

1. Yes 2. No
